# Supplementary material for: Isolation and Functional Analysis of VvWRKY28, a Vitis vinifera WRKY Transcription Factor Gene, with Functions in Tolerance to Cold and Salt Stress in Transgenic Arabidopsis thaliana
Source: MDPI journal article supplement (doi:10.3390/ijms232113418), 2022-11-02
Supplement: s1 [file s1]

**Table S1.** Primers used in this study

| Primer Name        | Primer sequence (5'→3') | Function                             |
|--------------------|-------------------------|--------------------------------------|
| <i>VvWRKY28</i> -F | ATGTCTGATGAGCCAAGAGA    | Clone full length of <i>VvWRKY28</i> |
| <i>VvWRKY28</i> -R | TCTCTTGGCTCATCAGACAT    | Clone full length of <i>VvWRKY28</i> |
| q-PCR-F            | CGTTGAAGGCAATCATAAGC    | q-PCR for <i>MbCBF1</i>              |
| q-PCR-R            | TTAGCCCCTGTGGGTAGAAA    | q-PCR for <i>MbCBF1</i>              |
| <i>Actin</i> -F    | GTTGCCCCTGAAGAACACCC    | q-PCR for Actin                      |
| <i>Actin</i> -R    | GAGATGGCTGGAAGAGGACT    | q-PCR for Actin                      |
| <i>RAB18</i> -F    | GCTTGCGATTTGGGATACAG    | Clone full length of <i>RAB18</i>    |
| <i>RAB18</i> -R    | CCAGACGAACCTTCAGCAGT    | Clone full length of <i>RAB18</i>    |
| <i>AtCOR15A</i> -F | CAACAGAGGAATCACCAGCGA   | Clone full length of <i>AtCOR15A</i> |
| <i>AtCOR15A</i> -R | CTCTGCTGTCTTGTCGTGGTGT  | Clone full length of <i>AtCOR15A</i> |
| <i>AtERD10</i> -F  | GCAGCAGGAGGAGAAGGG      | Clone full length of <i>AtERD10</i>  |
| <i>AtERD10</i> -R  | CACCAGGAAGAAGCCCATC     | Clone full length of <i>AtERD10</i>  |
| <i>AtPIF4</i> -R   | TGGAAGGCATTCTTGTTG      | Clone full length of <i>At PIF4</i>  |
| <i>At PIF4</i> -F  | GCAGCAGGAGGAGAAGGG      | Clone full length of <i>At PIF4</i>  |
| <i>AtCOR47</i> -F  | TGGTTGTAACGGAGCATC      | Clone full length of <i>AtCOR47</i>  |
| <i>AtCOR47</i> -R  | CCCCAAGAAATCAAACAA      | Clone full length of <i>AtCOR47</i>  |
| <i>AtICS1</i> -F   | CAACGAGGGGAAGATAAAAGTGT | Clone full length of <i>AtAtICS1</i> |
| <i>AtICS1</i> -R   | AGCCAGATGATTTTGGAGCCT   | Clone full length of <i>AtAtICS1</i> |
| <i>AtNCED3</i> -F  | ATGGCTTCTTCACGGCACGG    | Clone full length of <i>AtNCED3</i>  |
| <i>AtNCED3</i> -R  | TTCCCTTGCCCTCGGACG      | Clone full length of <i>AtNCED3</i>  |
| <i>AtCAT1</i> -F   | CGCCATGCCGAAAAATACCC    | Clone full length of <i>AtCAT1</i>   |
| <i>AtCAT1</i> -R   | CTTGCCTGTCTGAATCCCAGGAC | Clone full length of <i>AtCAT1</i>   |
| <i>AtP5CS1</i> -F  | GATACGGATATGGCAAAGCG    | Clone full length of <i>AtP5CS</i>   |
